# Supplementary material
Source: PubMed Central journal article supplement (PMC3430990)
Supplement: supp_ers169_00078311_file001.pdf [file supp_ers169_00078311_file001.pdf]

## Supplementary material

### Primers for PpPPO1 (Acc.No. AY904721)

| Name       | Sequence 5'-3'             | $T_m$ | restriction site |
|------------|----------------------------|-------|------------------|
| cPPO1_forw | GATCCATGGAGTTTACGTGCGTATTG | 53.1  | NcoI             |
| cPPO1_rev  | GCATGTCGACTTTCTCAAGCTTGATC | 57.8  | Sall             |

### Primers for PpPPO6 (PHYPA\_Pp1s90\_147V6.1)

| Name       | Sequence 5'-3'        | $T_m$ |
|------------|-----------------------|-------|
| cPPO6_forw | ACAACCTGGAAAAAGCAGGGC | 56.3  |
| cPPO6_rev  | CATAGTAACCTCCGGGCTGA  | 56.1  |

**Table S1:** Properties of PPO gene family members. Except for PPO9 gene models are derived from the V1.6 genome assembly (<https://www.cosmoss.org>). For PPO9 an edited version of V1.2 (see below) was used for computation. MW and pI were computed by [http://web.expasy.org/cgi-bin/compute\\_pi/pi\\_tool](http://web.expasy.org/cgi-bin/compute_pi/pi_tool).

| Gene name | Gene model number                   | ORF (aa) | MW (kDa) | Isoelectric point (pI) | No of introns in CDS according to gene model |
|-----------|-------------------------------------|----------|----------|------------------------|----------------------------------------------|
| PPO1      | Pp1s121_25V6.1                      | 536      | 60.12    | 9.42                   | 1                                            |
| PPO2      | Pp1s491_22V6.1                      | 550      | 62.30    | 9.31                   | 1                                            |
| PPO3      | Pp1s167_107V6.1                     | 559      | 62.69    | 7.26                   | 1                                            |
| PPO4      | Pp1s3_280V6.1                       | 575      | 64.82    | 6.02                   | 1                                            |
| PPO5      | Pp1s83_207V6.1                      | 569      | 64.48    | 9.13                   | 1                                            |
| PPO6      | Pp1s90_147V6.1                      | 552      | 62.79    | 8.77                   | 1                                            |
| PPO7      | Pp1s16_226V6.1                      | 546      | 62.15    | 5.51                   | 0                                            |
| PPO8      | Pp1s83_200V6.1                      | 541      | 61.51    | 5.38                   | 1                                            |
| PPO9      | Pp1s559_8V2.1 plus 29 N-terminal aa | 544      | 61.65    | 5.43                   | 2                                            |
| PPO10     | Pp1s455_4V6.1                       | 549      | 62.10    | 6.32                   | 0                                            |
| PPO11     | Pp1s3_617V6.1                       | 623      | 70.31    | 7.28                   | 2                                            |
| PPO12     | Pp1s85_167V6.1                      | 546      | 61.93    | 5.8                    | 0                                            |
| PPO13     | Pp1s41_46V6.1                       | 573      | 64.41    | 7.27                   | 1                                            |

*Deduced and edited amino acid sequence for PPO9 (Pp1s559\_8V2.1 plus 29 N-terminal aa)*

```
>PPO9_v1.2 edited
MGKFQETGSRRELTCCCKLGALVLIVSQMLMRITSGTPVVPAPILPDNCTSEEGCCMPQPYTGKPARDFEGDL
ALPIRIRRPVHKLNESEIARLERGYKLLRELPDLDPRLSNQANLHCLYCDNGIYYNNMTWPLEIHNNHWF
LPWHRMFLYFHERILAKLLDDDTFALPYWNWDNQSSSEANILPRIYSTNETSYLRDLNRNKCAQPPNLVH
LNSIGGCTDKTADLRIENTQVMYTQIVTGAPTPRLFFGEPYSYGDSGGYGPGTFEDNPHGTVHLWVGDPD
AATAFNDMGNFGRSARDPVFYTHHSNIDRIWTIWKTLPGKQRTEPTHADFLDSRFTYYDENADQVIVNLSQ
IINTPLLNRTRYEYESPTAWVSRGQKPGHEKNVTACNPLSPSQTNAMIYTTPELAAAGTLDAKPLTFRVT
RPERSDVGVEVLEIQGIKVDNTLQSHWGAYLFFPSAELNTSVSCPEFFGTFNFSPHVQQAQVTRDLVWRVG
IRQKLIDLGKDDYDDIVVTLVRFGPSIQQLQLGGTQVLYDTSPTTLD
```

## Supplementary figures

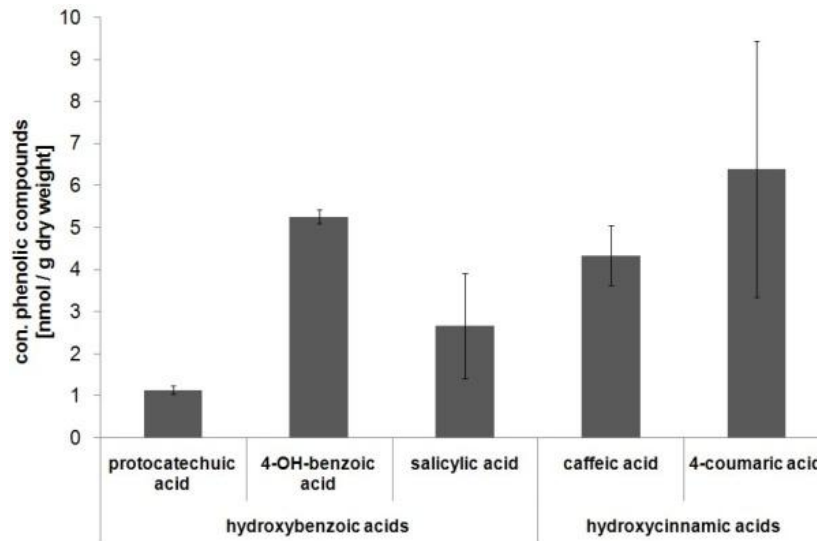

**Figure S1: Quantification of phenolic compounds in *P. patens* wild type tissue (n=6).** Error bars represent standard deviation of independent tissue samples. UPLC-MS was used to identify and quantify compounds.

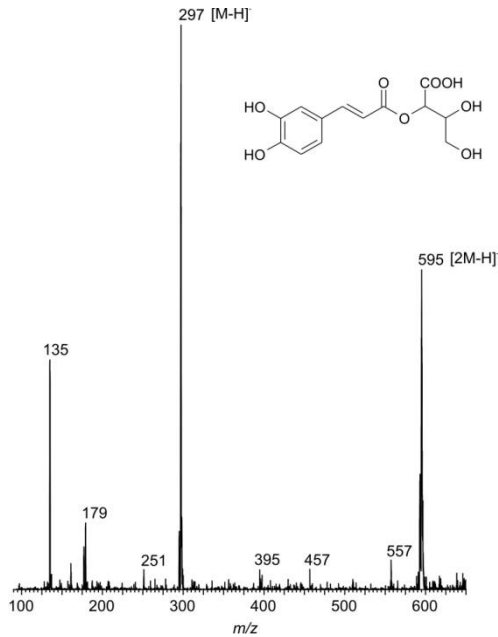

**Figure S 2:** ESI(-)-MS spectrum of the unknown ester of caffeic acid which was tentatively identified as 2-O-caffeoylthreonic acid, according to data published by Parveen *et al.* (2008).

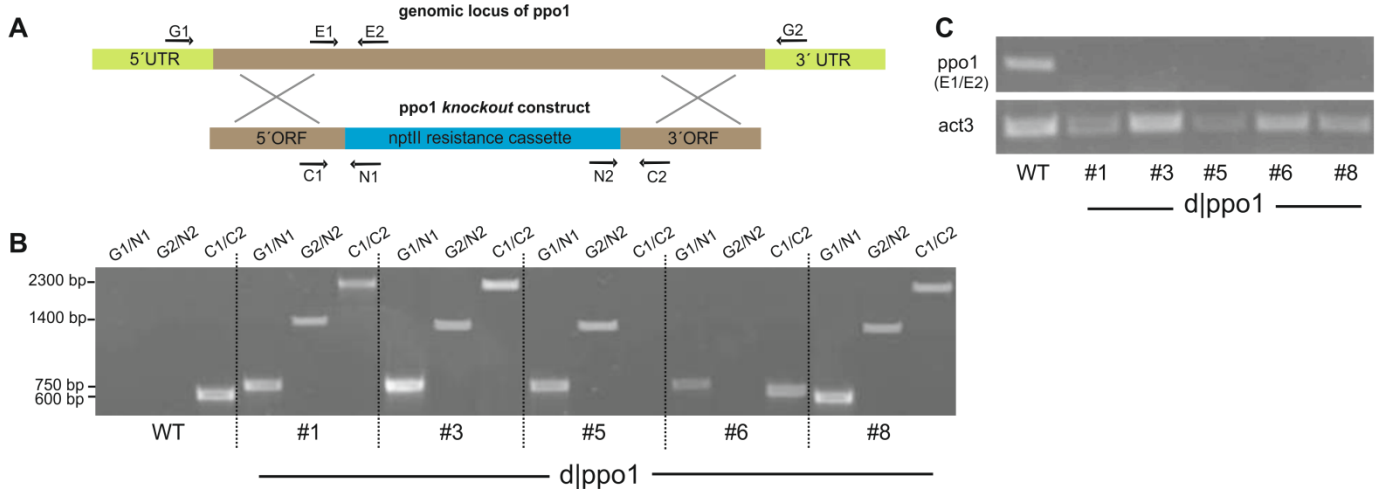

**Figure S3: Characterisation of *PPO1* knockout (*d|ppo1*) plants**

**(A) Schematic disruption of the genomic *PPO1* locus by insertion of the *nptII* cassette mediated by homologous recombination.** The 5' and 3' *nptII* flanking regions originating from the *PPO1* coding sequence are coloured brown; position of the primers used in B are indicated by arrows.

**(B) PCR analysis of genomic DNA** testing for disruption of the WT locus and 5' and 3' integration of the *PPO1* knockout construct for *d|ppo1* lines #1, #3, #5, #6 and #8. Primer combinations are given above each row and their binding positions are displayed in A.

**(C) Expression analysis of *PPO1* knockout lines** by RT-PCR performed with *PPO1* specific primers (shown as E1/E2 in A). *PPO1* was found to be expressed only in WT, but not in the transgenic *d|ppo1* lines (upper panel). As a positive control, RT-PCR was carried out with the primers for *ACT3* corresponding to the constitutively expressed *actin3* gene (lower panel).

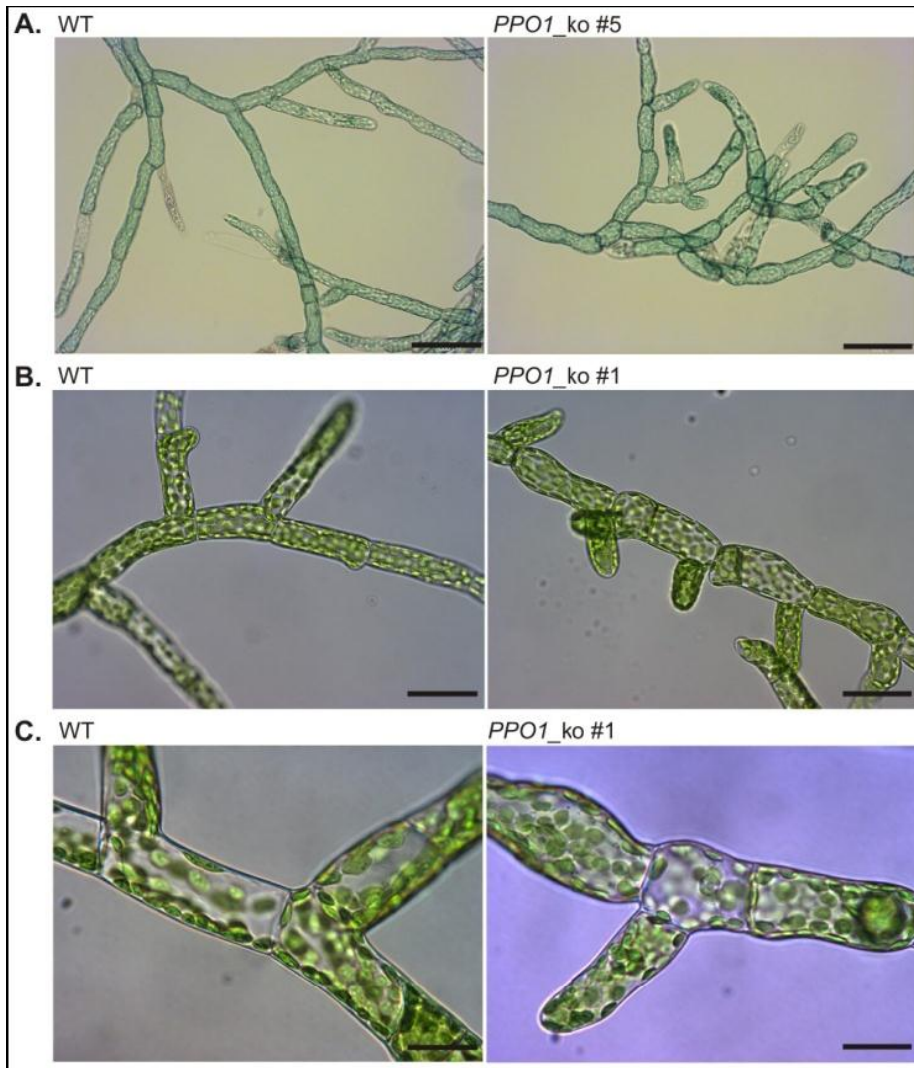

**Figure S4:** Protonema growth of *PPO1* knockout plants and wild type. Bright field microscopic images of protonema from 3 to 7 day old liquid cultures grown under standard conditions. The scale bars correspond to 100  $\mu\text{m}$  in A.; 50  $\mu\text{m}$  in B. and 20  $\mu\text{m}$  in C.
